# Supplementary material for: Visible-light-responsive reduced graphene oxide/g-C3N4/TiO2 composite nanocoating for photoelectric stimulation of neuronal and osteoblastic differentiation
Source: PubMed Central journal article supplement — RSC Adv. 2022 Mar 22;12(15):8878–88. doi: 10.1039/d2ra00282e (PMC8985170; doi:10.1039/d2ra00282e), 2022-03-22
Supplement: RA-012-D2RA00282E-s001.pdf [file RA-012-D2RA00282E-s001.pdf]

Supporting Information

**Visible-light-responsible reduced graphene oxide/g-C<sub>3</sub>N<sub>4</sub>/TiO<sub>2</sub>  
composite nanocoating for photoelectric stimulation of neuronal and  
osteoblastic differentiation**

*Ziru Yan<sup>1, 2</sup>, Kai Li<sup>1, 2\*</sup>, Dandan Shao<sup>1, 2</sup>, Qingyi Shen<sup>3</sup>, Yi Ding<sup>1</sup>, Shansong Huang<sup>1</sup>,*

*Youtao Xie<sup>1, 2</sup>, Xuebin Zheng<sup>1, 2\*</sup>*

<sup>1</sup>Key Laboratory of Inorganic Coating Materials CAS, Shanghai Institute of Ceramics,  
Chinese Academy of Sciences, Shanghai, China

<sup>2</sup>Center of Materials Science and Optoelectronics Engineering, University of Chinese  
Academy of Sciences, Beijing, China

<sup>3</sup>Department of Stomatology, Huashan Hospital, Fudan University, Shanghai, China

**\*Email address:** likai@mail.sic.ac.cn, xbzheng@mail.sic.ac.cn

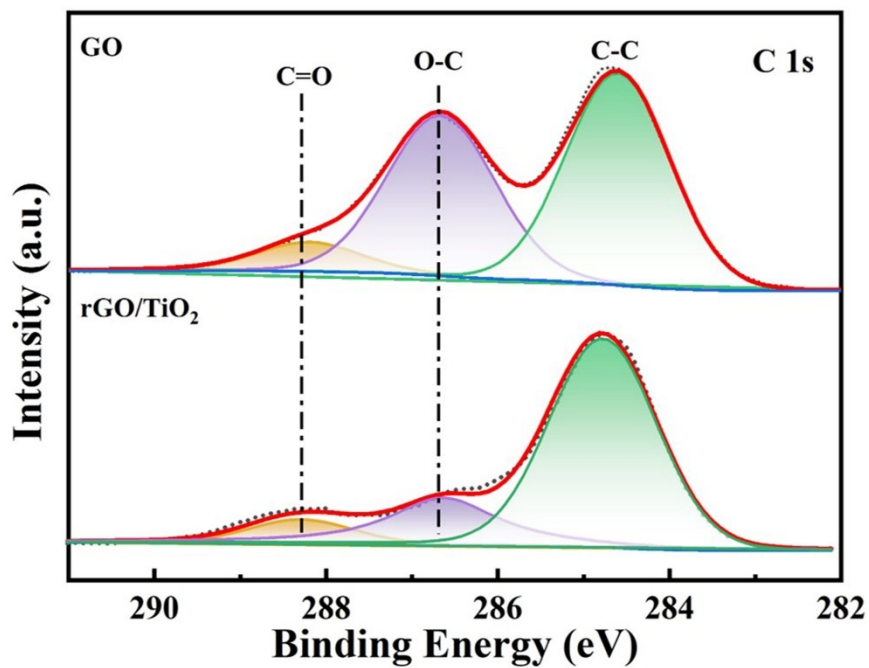

Fig. S1 XPS spectra for C 1s of the GO powder and the rGO/TiO<sub>2</sub> nanocoating.

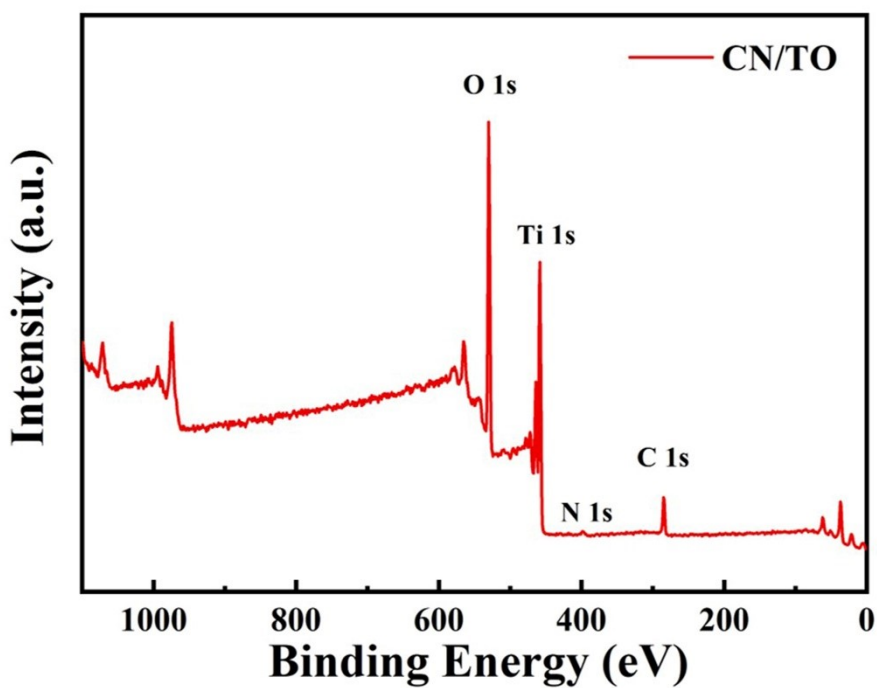

Fig. S2 XPS survey spectrum of the CN/TO nanocoating.

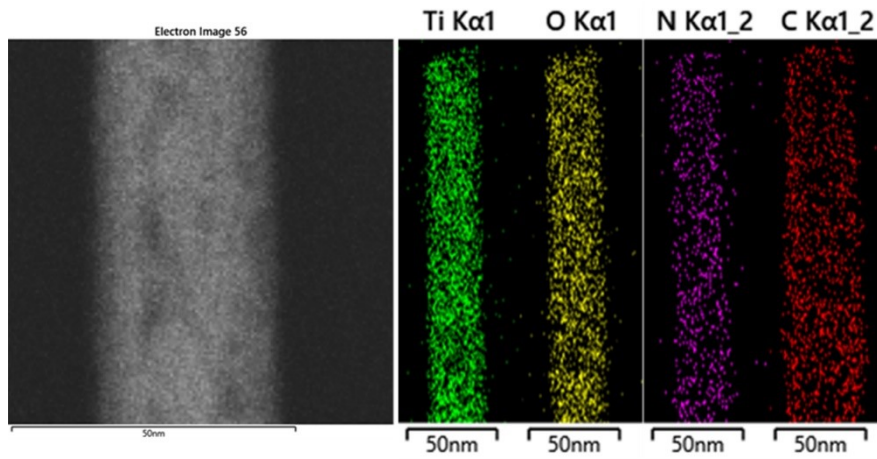

**Fig. S3** EDX elemental mappings of rGO/CN/TO.

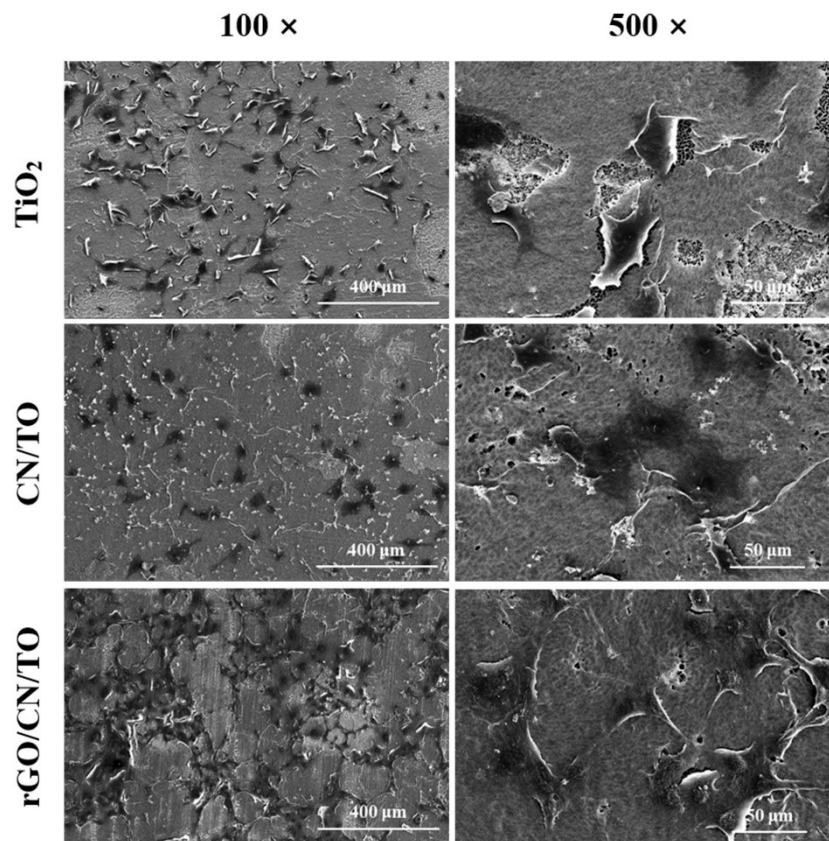

**Fig. S4** MC3T3-E1 cell responses on various nanocoatings after 1 d incubation.

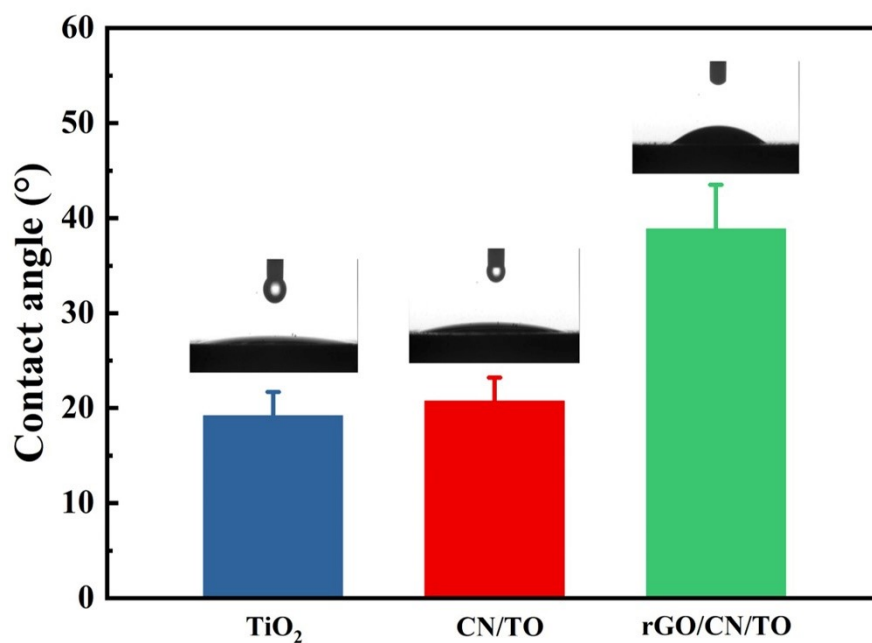

Fig. S5 Surface wettability of the samples.

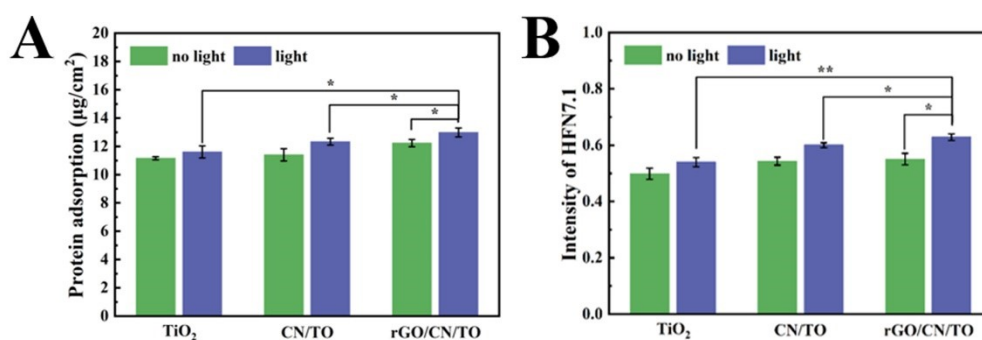

Fig. S6 (A) Adsorption amount and (B) exposed RGD sites of fibronectin on various samples with or without visible-light stimulation.

**Table S1.** XPS spectra fitting results of the TiO<sub>2</sub>, CN/TO and rGO/CN/TO nanocoatings.

| Sample           | Ti <sup>3+</sup> /(Ti <sup>3+</sup> +Ti <sup>4+</sup> )<br>[%] | Ti <sup>4+</sup> /(Ti <sup>3+</sup> +Ti <sup>4+</sup> )<br>[%] | O <sub>lat</sub> /(O <sub>lat</sub> +O <sub>ads</sub> )<br>[%] | O <sub>ads</sub> /(O <sub>lat</sub> +O <sub>ads</sub> )<br>[%] |
|------------------|----------------------------------------------------------------|----------------------------------------------------------------|----------------------------------------------------------------|----------------------------------------------------------------|
| TiO <sub>2</sub> | 10.2                                                           | 89.8                                                           | 92.2                                                           | 7.8                                                            |
| g-CN/TO          | 59.0                                                           | 41.0                                                           | 90.4                                                           | 9.6                                                            |
| rGO/CN/TO        | 51.0                                                           | 49.0                                                           | 82.4                                                           | 17.6                                                           |
